# Supplementary material for: TEMPO-mediated oxidized winter melon-based carbonaceous aerogel as an ultralight 3D support for enhanced photodegradation of organic pollutants
Source: Royal Society of Chemistry journal article supplement (doi:10.1039/c5cp04679c), 2015-01-01
Supplement: c5cp04679c1.pdf [file c5cp04679c1.pdf]

## Electronic Supplementary Information

### TEMPO-mediated oxidized winter melon-based carbonaceous aerogel as an ultralight 3D support for enhanced photodegradation capacities of organic pollutants

Miao Miao,<sup>a</sup> Gangling Wang,<sup>a</sup> Shaomei Cao,<sup>a</sup> Xin Feng,<sup>a\*</sup> Jianhui Fang<sup>b</sup> and Liyi Shi<sup>a</sup>

<sup>a</sup>Research Center of Nano Science and Technology, Shanghai University, Shanghai 200444, P. R.

China

<sup>b</sup>Department of Chemistry, College of Science, Shanghai University, Shanghai 200444, P. R.

China

\*Corresponding Author: [fengxin@shu.edu.cn](mailto:fengxin@shu.edu.cn)

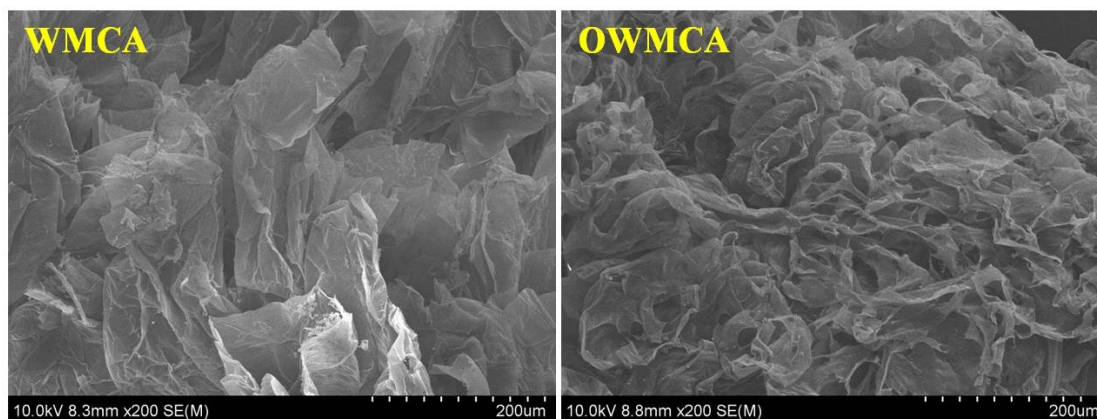

**Figure S1** SEM images of WMCA and OWMCA.

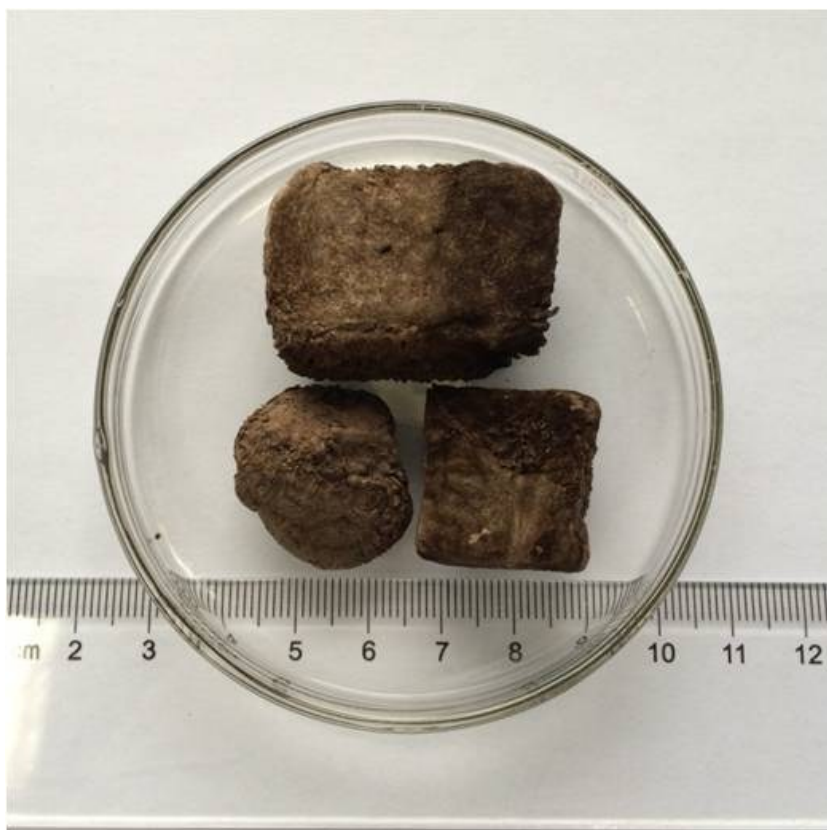

**Figure S2** Photograph of the as-prepared OWMCA monoliths with different volumes.

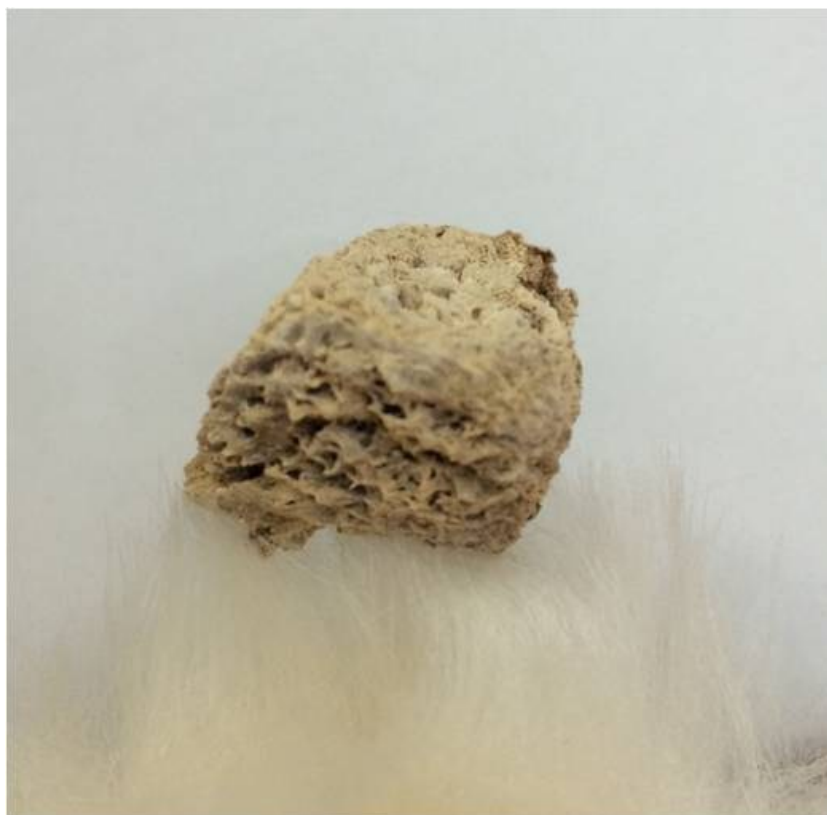

**Figure S3** Photographs of the BOB@OWMCA monolith standing on the feathers

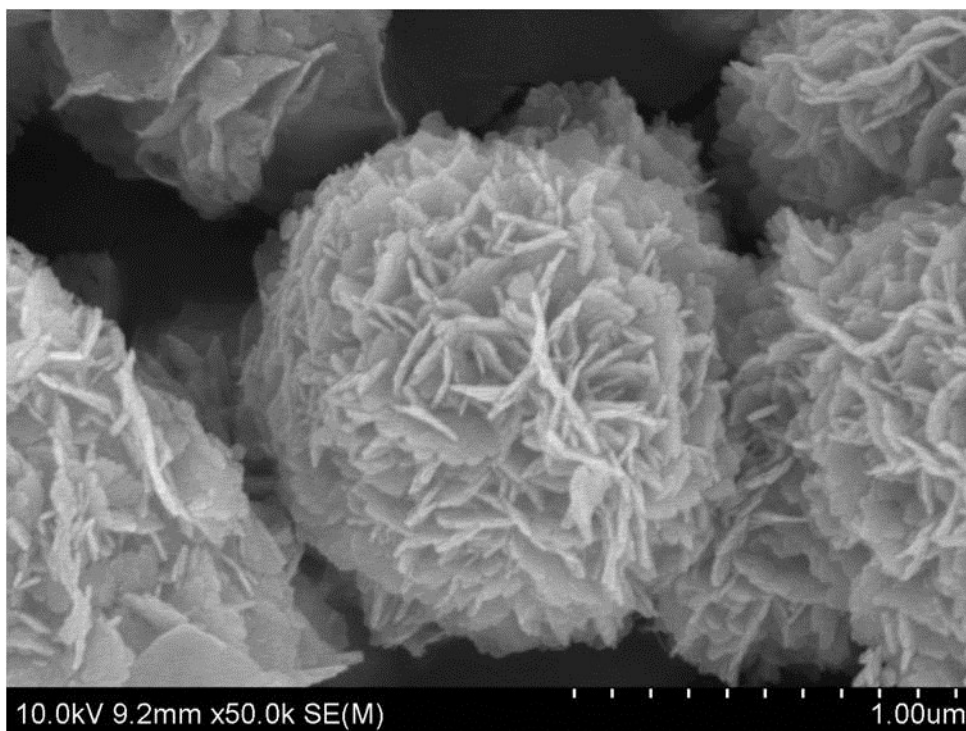

**Figure S4** SEM image of flower-like BiOBr microspheres on the surface of OWMCA.

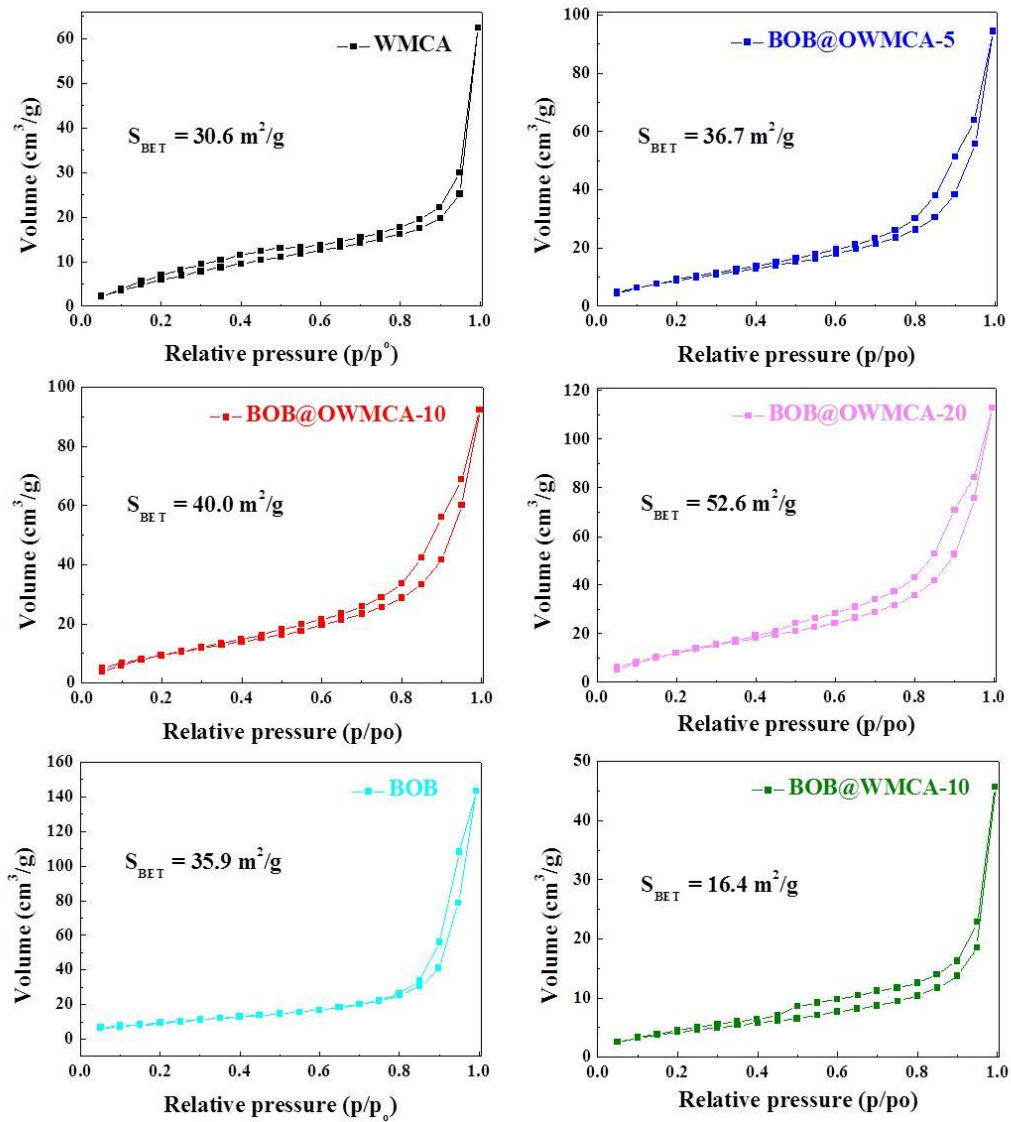

**Figure S5** Nitrogen adsorption-desorption isotherm of BOB@OWMCA composites with different ratios.
